# Supplementary material for: A Scoping Review of Dingo and Wild-Living Dog Ecology and Biology in Australia to Inform Parameterisation for Disease Spread Modelling
Source: Front Vet Sci. 2019 Mar 5;6:47. doi: 10.3389/fvets.2019.00047 (PMC6411765; doi:10.3389/fvets.2019.00047)
Supplement: Data Sheet 3 — Location data extracted from Level 3. [file Data_Sheet_3.xlsx]

## Sheet: koeppen_GPS_Sitepoints_final_wi
Data Sheet 3: Location data extracted from Level 3
Reference information				Topic of interest reported in the study																										Relevance of data for each topic of interest reported
Reference_ID	RefID_num	Reference	Section	Density	Index	Observations	Habitat	Diet	Water	Birth_rate	Litter_size	Litter_sex	Reproductive_age	Birth_period	Mating_period	Mortality	Life_span	Contact	Home_range	Dispersal	Movement	Long_distance	Age_independence	Temporal_activity	Seasonal_activity	Group_size	Proportion_sex	Proportion_age	Hybridisation	Density_data	Index_data	Observations_data	Habitat_data	Diet_data	Water_data	BirthRate_data	LitterSize_data	LitterRatio_data	ReproductiveAge_data	BirthPeriod_data	MatingPeriod_data	Mortality_data	LifeSpan_data	ContactRate_data	HomeRange_data	Dispersal_data	Movement_data	Longdistance_data	AgeIndependence_data
17	17	(Bannister et al., 2016)			Yes																										High
18	18	(Behrendorff and Allen, 2016)									Yes			Yes	Yes		Yes									Yes											Low			Low	Low		High
26	26	(Stephens et al., 2015)																											Yes
39	39	(Davis et al., 2015)						Yes																										High
40	40	(Gordon et al., 2015)			Yes																										High
40	40	(Gordon et al., 2015)			Yes																										High
40	40	(Gordon et al., 2015)			Yes																										High
51	51	(Leahy et al., 2015)			Yes																										High
56	56	(Frank et al., 2014)			Yes																				Yes	Yes					High
57	57	(Spencer et al., 2014)						Yes																										High
57	57	(Spencer et al., 2014)						Yes																										High
57	57	(Spencer et al., 2014)						Yes																										High
60	60	(Allen and Leung, 2014)						Yes																										High
60	60	(Allen and Leung, 2014)						Yes																										High
60	60	(Allen and Leung, 2014)						Yes																										High
63	63	(Greenville et al., 2014)			Yes																			Yes	Yes						High
63	63	(Greenville et al., 2014)			Yes																			Yes	Yes						High
63	63	(Greenville et al., 2014)			Yes																			Yes	Yes						High
65	65	(Forsyth et al., 2014)			Yes		Yes																	Yes	Yes						High		High
65	65	(Forsyth et al., 2014)			Yes		Yes																	Yes	Yes						High		High
65	65	(Forsyth et al., 2014)			Yes		Yes																	Yes	Yes						High		High
65	65	(Forsyth et al., 2014)			Yes		Yes																	Yes	Yes						High		High
65	65	(Forsyth et al., 2014)			Yes		Yes																	Yes	Yes						High		High
65	65	(Forsyth et al., 2014)			Yes		Yes																	Yes	Yes						High		High
68	68	(Newsome et al., 2014a)						Yes																										High
68	68	(Newsome et al., 2014a)						Yes																										High
68	68	(Newsome et al., 2014a)						Yes																										High
68	68	(Newsome et al., 2014a)						Yes																										High
68	68	(Newsome et al., 2014a)						Yes																										High
68	68	(Newsome et al., 2014a)						Yes																										High
68	68	(Newsome et al., 2014a)						Yes																										High
68	68	(Newsome et al., 2014a)						Yes																										High
68	68	(Newsome et al., 2014a)						Yes																										High
68	68	(Newsome et al., 2014a)						Yes																										High
68	68	(Newsome et al., 2014a)						Yes																										High
68	68	(Newsome et al., 2014a)						Yes																										High
68	68	(Newsome et al., 2014a)						Yes																										High
68	68	(Newsome et al., 2014a)						Yes																										High
68	68	(Newsome et al., 2014a)						Yes																										High
75	75	(Allen et al., 2013b)					Yes												Yes					Yes			Yes	Yes					High												High
75	75	(Allen et al., 2013b)					Yes												Yes					Yes			Yes	Yes					High												High
77	77	(Newsome et al., 2013b)					Yes											Yes	Yes		Yes	Yes		Yes		Yes	Yes						High											Low	High		High	High
77	77	(Newsome et al., 2013b)					Yes											Yes	Yes		Yes	Yes		Yes		Yes	Yes						High											Low	High		High	High
78	78	(Allen et al., 2013a)			Yes																				Yes						High
78	78	(Allen et al., 2013a)			Yes																				Yes						High
78	78	(Allen et al., 2013a)			Yes																				Yes						High
78	78	(Allen et al., 2013a)			Yes																				Yes						High
78	78	(Allen et al., 2013a)			Yes																				Yes						High
78	78	(Allen et al., 2013a)			Yes																				Yes						High
78	78	(Allen et al., 2013a)			Yes																				Yes						High
78	78	(Allen et al., 2013a)			Yes																				Yes						High
78	78	(Allen et al., 2013a)			Yes																				Yes						High
80	80	(Appleby et al., 2013)									Yes			Yes																							Low			Low
83	83	(Letnic and Crowther, 2013)			Yes																										High
83	83	(Letnic and Crowther, 2013)			Yes																										High
83	83	(Letnic and Crowther, 2013)			Yes																										High
83	83	(Letnic and Crowther, 2013)			Yes																										High
83	83	(Letnic and Crowther, 2013)			Yes																										High
83	83	(Letnic and Crowther, 2013)			Yes																										High
83	83	(Letnic and Crowther, 2013)			Yes																										High
83	83	(Letnic and Crowther, 2013)			Yes																										High
83	83	(Letnic and Crowther, 2013)			Yes																										High
91	91	(Newsome et al., 2013c)																									Yes		Yes
91	91	(Newsome et al., 2013c)																									Yes		Yes
91	91	(Newsome et al., 2013c)																									Yes		Yes
91	91	(Newsome et al., 2013c)																									Yes		Yes
91	91	(Newsome et al., 2013c)																									Yes		Yes
91	91	(Newsome et al., 2013c)																									Yes		Yes
91	91	(Newsome et al., 2013c)																									Yes		Yes
91	91	(Newsome et al., 2013c)																									Yes		Yes
91	91	(Newsome et al., 2013c)																									Yes		Yes
91	91	(Newsome et al., 2013c)																									Yes		Yes
91	91	(Newsome et al., 2013c)																									Yes		Yes
91	91	(Newsome et al., 2013c)																									Yes		Yes
91	91	(Newsome et al., 2013c)																									Yes		Yes
91	91	(Newsome et al., 2013c)																									Yes		Yes
91	91	(Newsome et al., 2013c)																									Yes		Yes
98	98	(Brook et al., 2012)			Yes																			Yes							High
98	98	(Brook et al., 2012)			Yes																			Yes							High
98	98	(Brook et al., 2012)			Yes																			Yes							High
98	98	(Brook et al., 2012)			Yes																			Yes							High
98	98	(Brook et al., 2012)			Yes																			Yes							High
98	98	(Brook et al., 2012)			Yes																			Yes							High
98	98	(Brook et al., 2012)			Yes																			Yes							High
98	98	(Brook et al., 2012)			Yes																			Yes							High
98	98	(Brook et al., 2012)			Yes																			Yes							High
103	103	(Palmer, 2012)						Yes																										High
108	108	(Kennedy et al., 2012)			Yes																										High
108	108	(Kennedy et al., 2012)			Yes																										High
109	109	(Allen and Leung, 2012)						Yes																										High
109	109	(Allen and Leung, 2012)						Yes																										High
109	109	(Allen and Leung, 2012)						Yes																										High
109	109	(Allen and Leung, 2012)						Yes																										High
109	109	(Allen and Leung, 2012)						Yes																										High
112	112	(Allen, 2012a)					Yes		Yes										Yes		Yes			Yes		Yes	Yes	Yes					High		High										High		Low
114	114	(Radford et al., 2012)					Yes																						Yes				High
115	115	(Allen, 2012c)			Yes																				Yes						High
115	115	(Allen, 2012c)			Yes																				Yes						High
115	115	(Allen, 2012c)			Yes																				Yes						High
116	116	(Wang and Fisher, 2012)			Yes									Yes										Yes	Yes						High									Low
118	118	(Allen, 2012b)			Yes																				Yes						High
118	118	(Allen, 2012b)			Yes																				Yes						High
118	118	(Allen, 2012b)			Yes																				Yes						High
118	118	(Allen, 2012b)			Yes																				Yes						High
120	120	(Moseby et al., 2012)									Yes			Yes							Yes																Low			Low							High
123	123	(Moseby et al., 2011)			Yes																				Yes						High
126	126	(Letnic and Dworjanyn, 2011)			Yes			Yes																							High			High
126	126	(Letnic and Dworjanyn, 2011)			Yes			Yes																							High			High
127	127	(Somaweera et al., 2011)			Yes			Yes																Yes		Yes					High			High
129	129	(Cupples et al., 2011)						Yes																										High
129	129	(Cupples et al., 2011)						Yes																										High
129	129	(Cupples et al., 2011)						Yes																										High
129	129	(Cupples et al., 2011)						Yes																										High
129	129	(Cupples et al., 2011)						Yes																										High
132	132	(Pascoe et al., 2011)						Yes																										High
133	133	(Brawata and Neeman, 2011)			Yes		Yes																								High		High
133	133	(Brawata and Neeman, 2011)			Yes		Yes																								High		High
133	133	(Brawata and Neeman, 2011)			Yes		Yes																								High		High
133	133	(Brawata and Neeman, 2011)			Yes		Yes																								High		High
133	133	(Brawata and Neeman, 2011)			Yes		Yes																								High		High
145	145	(Wallach et al., 2010)			Yes		Yes																								High		High
145	145	(Wallach et al., 2010)			Yes		Yes																								High		High
145	145	(Wallach et al., 2010)			Yes		Yes																								High		High
145	145	(Wallach et al., 2010)			Yes		Yes																								High		High
145	145	(Wallach et al., 2010)			Yes		Yes																								High		High
145	145	(Wallach et al., 2010)			Yes		Yes																								High		High
145	145	(Wallach et al., 2010)			Yes		Yes																								High		High
146	146	(Claridge et al., 2010a)			Yes																				Yes						High
146	146	(Claridge et al., 2010a)			Yes																				Yes						High
146	146	(Claridge et al., 2010a)			Yes																				Yes						High
149	149	(Letnic and Koch, 2010)			Yes																										High
149	149	(Letnic and Koch, 2010)			Yes																										High
149	149	(Letnic and Koch, 2010)			Yes																										High
153	153	(Robley et al., 2010)					Yes												Yes		Yes	Yes		Yes			Yes	Yes	Yes				High												High		High	High
155	155	(Claridge et al., 2010b)						Yes																										High
155	155	(Claridge et al., 2010b)						Yes																										High
155	155	(Claridge et al., 2010b)						Yes																										High
155	155	(Claridge et al., 2010b)						Yes																										High
155	155	(Claridge et al., 2010b)						Yes																										High
155	155	(Claridge et al., 2010b)						Yes																										High
155	155	(Claridge et al., 2010b)						Yes																										High
155	155	(Claridge et al., 2010b)						Yes																										High
155	155	(Claridge et al., 2010b)						Yes																										High
155	155	(Claridge et al., 2010b)						Yes																										High
155	155	(Claridge et al., 2010b)						Yes																										High
155	155	(Claridge et al., 2010b)						Yes																										High
155	155	(Claridge et al., 2010b)						Yes																										High
155	155	(Claridge et al., 2010b)						Yes																										High
155	155	(Claridge et al., 2010b)						Yes																										High
157	157	(Allen, 2010)						Yes						Yes												Yes								High						Low
160	160	(Letnic et al., 2009b)			Yes			Yes																							High			High
160	160	(Letnic et al., 2009b)			Yes			Yes																							High			High
160	160	(Letnic et al., 2009b)			Yes			Yes																							High			High
160	160	(Letnic et al., 2009b)			Yes			Yes																							High			High
160	160	(Letnic et al., 2009b)			Yes			Yes																							High			High
160	160	(Letnic et al., 2009b)			Yes			Yes																							High			High
160	160	(Letnic et al., 2009b)			Yes			Yes																							High			High
160	160	(Letnic et al., 2009b)			Yes			Yes																							High			High
161	161	(Claridge et al., 2009)																	Yes		Yes	Yes					Yes	Yes	Yes																High		High	High
161	161	(Claridge et al., 2009)																	Yes		Yes	Yes					Yes	Yes	Yes																High		High	High
161	161	(Claridge et al., 2009)																	Yes		Yes	Yes					Yes	Yes	Yes																High		High	High
161	161	(Claridge et al., 2009)																	Yes		Yes	Yes					Yes	Yes	Yes																High		High	High
161	161	(Claridge et al., 2009)																	Yes		Yes	Yes					Yes	Yes	Yes																High		High	High
162	162	(Letnic et al., 2009a)			Yes																										High
162	162	(Letnic et al., 2009a)			Yes																										High
162	162	(Letnic et al., 2009a)			Yes																										High
171	171	(Wallach and O'Neill, 2009)			Yes																										High
171	171	(Wallach and O'Neill, 2009)			Yes																										High
172	172	(Robley et al., 2009)																	Yes		Yes						Yes																		High		High
172	172	(Robley et al., 2009)																	Yes		Yes						Yes																		High		High
173	173	(Wallach et al., 2009a)						Yes																										High
173	173	(Wallach et al., 2009a)						Yes																										High
173	173	(Wallach et al., 2009a)						Yes																										High
173	173	(Wallach et al., 2009a)			Yes																										High
173	173	(Wallach et al., 2009a)			Yes																										High
173	173	(Wallach et al., 2009a)			Yes																										High
173	173	(Wallach et al., 2009a)			Yes																										High
173	173	(Wallach et al., 2009a)			Yes																										High
173	173	(Wallach et al., 2009a)			Yes																										High
175	175	(Wallach et al., 2009b)			Yes																										High
175	175	(Wallach et al., 2009b)			Yes																										High
175	175	(Wallach et al., 2009b)			Yes																										High
175	175	(Wallach et al., 2009b)			Yes																										High
175	175	(Wallach et al., 2009b)			Yes																										High
175	175	(Wallach et al., 2009b)			Yes																										High
175	175	(Wallach et al., 2009b)			Yes																										High
181	181	(Pavey et al., 2008)			Yes			Yes																	Yes						High			High
184	184	(Glen and Dickman, 2008)						Yes																										High
187	187	(Elledge et al., 2008)																											Yes
187	187	(Elledge et al., 2008)																											Yes
187	187	(Elledge et al., 2008)																											Yes
187	187	(Elledge et al., 2008)																											Yes
200	200	(West and Saunders, 2007)			Yes																										High
217	217	(Moseby et al., 2006)			Yes																				Yes						High
217	217	(Moseby et al., 2006)			Yes																				Yes						High
219	219	(Mitchell and Banks, 2005)						Yes																										High
219	219	(Mitchell and Banks, 2005)						Yes																										High
219	219	(Mitchell and Banks, 2005)						Yes																										High
219	219	(Mitchell and Banks, 2005)						Yes																										High
219	219	(Mitchell and Banks, 2005)						Yes																										High
219	219	(Mitchell and Banks, 2005)						Yes																										High
219	219	(Mitchell and Banks, 2005)						Yes																										High
219	219	(Mitchell and Banks, 2005)						Yes																										High
219	219	(Mitchell and Banks, 2005)						Yes																										High
219	219	(Mitchell and Banks, 2005)						Yes																										High
229	229	(Koertner and Watson, 2005)			Yes																										High
231	231	(Marks et al., 2004)																						Yes			Yes
245	245	(Banks et al., 2003)																											Yes
256	256	(Paltridge, 2002)						Yes																										High
256	256	(Paltridge, 2002)						Yes																										High
263	263	(Vernes et al., 2001)						Yes																										High
263	263	(Vernes et al., 2001)						Yes																										High
263	263	(Vernes et al., 2001)						Yes																										High
263	263	(Vernes et al., 2001)						Yes																										High
263	263	(Vernes et al., 2001)						Yes																										High
263	263	(Vernes et al., 2001)						Yes																										High
263	263	(Vernes et al., 2001)						Yes																										High
266	266	(Corbett, 2001)																											Yes
266	266	(Corbett, 2001)																											Yes
266	266	(Corbett, 2001)																											Yes
266	266	(Corbett, 2001)																											Yes
266	266	(Corbett, 2001)																											Yes
266	266	(Corbett, 2001)																											Yes
266	266	(Corbett, 2001)																											Yes
266	266	(Corbett, 2001)																											Yes
266	266	(Corbett, 2001)																											Yes
266	266	(Corbett, 2001)																											Yes
266	266	(Corbett, 2001)																											Yes
266	266	(Corbett, 2001)																											Yes
266	266	(Corbett, 2001)																											Yes
266	266	(Corbett, 2001)																											Yes
266	266	(Corbett, 2001)																											Yes
266	266	(Corbett, 2001)																											Yes
266	266	(Corbett, 2001)																											Yes
266	266	(Corbett, 2001)																											Yes
266	266	(Corbett, 2001)																											Yes
266	266	(Corbett, 2001)																											Yes
266	266	(Corbett, 2001)																											Yes
266	266	(Corbett, 2001)																											Yes
273	273	(Glen and Short, 2000)			Yes																										High
274	274	(Vernes, 2000)						Yes																										High
292	292	(Catling et al., 1999)			Yes																										High
292	292	(Catling et al., 1999)			Yes																										High
292	292	(Catling et al., 1999)			Yes																										High
296	296	(Meek and Triggs, 1998)						Yes																										High
296	296	(Meek and Triggs, 1998)						Yes																										High
300	300	(Mahon et al., 1998)					Yes																										High
300	300	(Mahon et al., 1998)					Yes																										High
300	300	(Mahon et al., 1998)					Yes																										High
300	300	(Mahon et al., 1998)					Yes																										High
306	306	(Jones and Johnson, 1997)			Yes																										Low
306	306	(Jones and Johnson, 1997)			Yes																										Low
306	306	(Jones and Johnson, 1997)			Yes																										Low
306	306	(Jones and Johnson, 1997)			Yes																										Low
306	306	(Jones and Johnson, 1997)			Yes																										Low
306	306	(Jones and Johnson, 1997)			Yes																										Low
306	306	(Jones and Johnson, 1997)			Yes																										Low
306	306	(Jones and Johnson, 1997)			Yes																										Low
306	306	(Jones and Johnson, 1997)			Yes																										Low
306	306	(Jones and Johnson, 1997)			Yes																										Low
306	306	(Jones and Johnson, 1997)			Yes																										Low
306	306	(Jones and Johnson, 1997)			Yes																										Low
306	306	(Jones and Johnson, 1997)			Yes																										Low
306	306	(Jones and Johnson, 1997)			Yes																										Low
306	306	(Jones and Johnson, 1997)			Yes																										Low
313	313	(Allen et al., 1996)			Yes																										High
314	314	(Lunney et al., 1996)						Yes																										High
318	318	(Southgate et al., 1996)						Yes																										Low
318	318	(Southgate et al., 1996)						Yes																										Low
318	318	(Southgate et al., 1996)						Yes																										Low
318	318	(Southgate et al., 1996)						Yes																										Low
318	318	(Southgate et al., 1996)						Yes																										Low
318	318	(Southgate et al., 1996)						Yes																										Low
320	320	(Christensen and Burrows, 1994)			Yes																										High
322	322	(Corbett, 1995)		Yes				Yes																						High				High
353	353	(Brown and Triggs, 1990)						Yes																										High
354	354	(Lunney et al., 1990)						Yes																										High
355	355	(Jones, 1990)																									Yes	Yes
355	355	(Jones, 1990)																									Yes	Yes
355	355	(Jones, 1990)																									Yes	Yes
355	355	(Jones, 1990)																									Yes	Yes
355	355	(Jones, 1990)																									Yes	Yes
355	355	(Jones, 1990)																									Yes	Yes
355	355	(Jones, 1990)																									Yes	Yes
356	356	(Marsack and Campbell, 1990)						Yes																		Yes								High
364	364	(Corbett, 1989)						Yes																										High
367	367	(Jones and Stevens, 1988)									Yes		Yes	Yes	Yes																						High		High	High	High
367	367	(Jones and Stevens, 1988)									Yes		Yes	Yes	Yes																						High		High	High	High
367	367	(Jones and Stevens, 1988)									Yes		Yes	Yes	Yes																						High		High	High	High
367	367	(Jones and Stevens, 1988)									Yes		Yes	Yes	Yes																						High		High	High	High
367	367	(Jones and Stevens, 1988)									Yes		Yes	Yes	Yes																						High		High	High	High
367	367	(Jones and Stevens, 1988)									Yes		Yes	Yes	Yes																						High		High	High	High
367	367	(Jones and Stevens, 1988)									Yes		Yes	Yes	Yes																						High		High	High	High
372	372	(Corbett and Newsome, 1987)						Yes																										High
379	379	(Newsome and Corbett, 1985)					Yes																						Yes				High
379	379	(Newsome and Corbett, 1985)					Yes																						Yes				High
379	379	(Newsome and Corbett, 1985)					Yes																						Yes				High
379	379	(Newsome and Corbett, 1985)					Yes																						Yes				High
379	379	(Newsome and Corbett, 1985)					Yes																						Yes				High
379	379	(Newsome and Corbett, 1985)					Yes																						Yes				High
379	379	(Newsome and Corbett, 1985)					Yes																						Yes				High
379	379	(Newsome and Corbett, 1985)					Yes																						Yes				High
379	379	(Newsome and Corbett, 1985)					Yes																						Yes				High
379	379	(Newsome and Corbett, 1985)					Yes																						Yes				High
379	379	(Newsome and Corbett, 1985)					Yes																						Yes				High
381	381	(Harden, 1985)																	Yes		Yes			Yes																					High		High
382	382	(Robertshaw and Harden, 1985b)						Yes																										High
390	390	(Triggs et al., 1984)						Yes																										High
397	397	(Newsome et al., 1983a)			Yes			Yes																		Yes					High			High
397	397	(Newsome et al., 1983a)			Yes			Yes																		Yes					High			High
399	399	(Newsome et al., 1983b)						Yes																										High
399	399	(Newsome et al., 1983b)						Yes																										High
400	400	(Woodall, 1983)			Yes											Yes															High											High
401	401	(Newsome and Corbett, 1982)																											Yes
405	405	(Shepherd, 1981)				Yes																		Yes		Yes						Low
406	406	(Catling, 1979)													Yes																										High
407	407	(Caughley et al., 1980)			Yes																										High
407	407	(Caughley et al., 1980)			Yes																										High
407	407	(Caughley et al., 1980)			Yes																										High
407	407	(Caughley et al., 1980)			Yes																										High
417	417	(Whitehouse, 1977b)																			Yes																										High
422	422	(Calaby and Keith, 1974)					Yes																			Yes							Low
441	441	(Hodge, 1954)													Yes								Yes			Yes	Yes	Yes													Low								Low
458	458	(Krefft, 1862)									Yes																										Low
504	504	(Allen et al., 2015)		Yes							Yes					Yes										Yes				High							High					High
519	519	(Read et al., 2015)			Yes		Yes																	Yes	Yes						High		High
519	519	(Read et al., 2015)			Yes		Yes																	Yes	Yes						High		High
612	612	(Allen et al., 2012)						Yes																										High
612	612	(Allen et al., 2012)						Yes																										High
612	612	(Allen et al., 2012)						Yes																										High
612	612	(Allen et al., 2012)						Yes																										High
612	612	(Allen et al., 2012)						Yes																										High
626	626	(Glen et al., 2011)						Yes																										High
632	632	(Brook and Kutt, 2011)						Yes																										High
632	632	(Brook and Kutt, 2011)						Yes																										High
632	632	(Brook and Kutt, 2011)						Yes																										High
632	632	(Brook and Kutt, 2011)						Yes																										High
632	632	(Brook and Kutt, 2011)						Yes																										High
632	632	(Brook and Kutt, 2011)						Yes																										High
632	632	(Brook and Kutt, 2011)						Yes																										High
632	632	(Brook and Kutt, 2011)						Yes																										High
632	632	(Brook and Kutt, 2011)						Yes																										High
632	632	(Brook and Kutt, 2011)						Yes																										High
632	632	(Brook and Kutt, 2011)						Yes																										High
632	632	(Brook and Kutt, 2011)						Yes																										High
632	632	(Brook and Kutt, 2011)						Yes																										High
632	632	(Brook and Kutt, 2011)						Yes																										High
632	632	(Brook and Kutt, 2011)						Yes																										High
632	632	(Brook and Kutt, 2011)						Yes																										High
632	632	(Brook and Kutt, 2011)						Yes																										High
632	632	(Brook and Kutt, 2011)						Yes																										High
632	632	(Brook and Kutt, 2011)						Yes																										High
632	632	(Brook and Kutt, 2011)						Yes																										High
632	632	(Brook and Kutt, 2011)						Yes																										High
689	689	(Southgate et al., 2007)			Yes		Yes																								High		High
689	689	(Southgate et al., 2007)			Yes		Yes																								High		High
689	689	(Southgate et al., 2007)			Yes		Yes																								High		High
689	689	(Southgate et al., 2007)			Yes		Yes																								High		High
696	696	(Banks et al., 2006)						Yes																			Yes	Yes						High
729	729	(Burrows et al., 2003)			Yes																				Yes						High
748	748	(Edwards et al., 2002b)			Yes																				Yes						High
748	748	(Edwards et al., 2002b)			Yes																				Yes						High
748	748	(Edwards et al., 2002b)			Yes																				Yes						High
748	748	(Edwards et al., 2002b)			Yes																				Yes						High
748	748	(Edwards et al., 2002b)			Yes																				Yes						High
748	748	(Edwards et al., 2002b)			Yes																				Yes						High
754	754	(Newsome et al., 2001)			Yes																				Yes						High
754	754	(Newsome et al., 2001)			Yes																				Yes						High
767	767	(Eldridge et al., 2000)			Yes																										High
767	767	(Eldridge et al., 2000)			Yes																										High
767	767	(Eldridge et al., 2000)			Yes																										High
791	791	(Fleming, 1996c)		Yes	Yes																									High	High
791	791	(Fleming, 1996c)		Yes	Yes																									High	High
791	791	(Fleming, 1996c)		Yes	Yes																									High	High
793	793	(Catling and Burt, 1995b)			Yes																										High
793	793	(Catling and Burt, 1995b)			Yes																										High
793	793	(Catling and Burt, 1995b)			Yes																										High
793	793	(Catling and Burt, 1995b)			Yes																										High
793	793	(Catling and Burt, 1995b)			Yes																										High
793	793	(Catling and Burt, 1995b)			Yes																										High
793	793	(Catling and Burt, 1995b)			Yes																										High
793	793	(Catling and Burt, 1995b)			Yes																										High
793	793	(Catling and Burt, 1995b)			Yes																										High
793	793	(Catling and Burt, 1995b)			Yes																										High
793	793	(Catling and Burt, 1995b)			Yes																										High
793	793	(Catling and Burt, 1995b)			Yes																										High
793	793	(Catling and Burt, 1995b)			Yes																										High
793	793	(Catling and Burt, 1995b)			Yes																										High
793	793	(Catling and Burt, 1995b)			Yes																										High
793	793	(Catling and Burt, 1995b)			Yes																										High
793	793	(Catling and Burt, 1995b)			Yes																										High
793	793	(Catling and Burt, 1995b)			Yes																										High
793	793	(Catling and Burt, 1995b)			Yes																										High
793	793	(Catling and Burt, 1995b)			Yes																										High
793	793	(Catling and Burt, 1995b)			Yes																										High
798	798	(Lundiejenkins et al., 1993)			Yes		Yes	Yes																	Yes						High		High	High
805	805	(Catling et al., 1992)									Yes	Yes	Yes	Yes	Yes																						High	High	High	High	High
805	805	(Catling et al., 1992)									Yes	Yes	Yes	Yes	Yes																						High	High	High	High	High
805	805	(Catling et al., 1992)									Yes	Yes	Yes	Yes	Yes																						High	High	High	High	High
805	805	(Catling et al., 1992)									Yes	Yes	Yes	Yes	Yes																						High	High	High	High	High
806	806	(Thomson, 1992a)																									Yes	Yes
806	806	(Thomson, 1992a)																									Yes	Yes
806	806	(Thomson, 1992a)																									Yes	Yes
807	807	(Thomson, 1992b)			Yes									Yes	Yes			Yes			Yes		Yes	Yes	Yes						High									High	High			High			High		High
807	807	(Thomson, 1992b)			Yes									Yes	Yes			Yes			Yes		Yes	Yes	Yes						High									High	High			High			High		High
807	807	(Thomson, 1992b)			Yes									Yes	Yes			Yes			Yes		Yes	Yes	Yes						High									High	High			High			High		High
809	809	(Thomson, 1992c)					Yes											Yes	Yes	Yes	Yes				Yes	Yes	Yes	Yes					High											High	High	High	High
810	810	(Thomson et al., 1992a)		Yes			Yes			Yes	Yes		Yes			Yes		Yes	Yes	Yes	Yes				Yes	Yes	Yes	Yes		High			Low			High	High		Low			High		High	High	High	High
811	811	(Thomson et al., 1992b)														Yes				Yes		Yes			Yes	Yes	Yes	Yes														High				High		High
830	830	(Hudson et al., 2016)									Yes	Yes		Yes																							Low	Low		Low
837	837	(Behrendorff et al., 2016)						Yes																										High
839	839	(Allen et al., 2016a)						Yes																										High
839	839	(Allen et al., 2016a)						Yes																										High
839	839	(Allen et al., 2016a)						Yes																										High
839	839	(Allen et al., 2016a)						Yes																										High
839	839	(Allen et al., 2016a)						Yes																										High
839	839	(Allen et al., 2016a)						Yes																										High
839	839	(Allen et al., 2016a)						Yes																										High
839	839	(Allen et al., 2016a)						Yes																										High
839	839	(Allen et al., 2016a)						Yes																										High
839	839	(Allen et al., 2016a)						Yes																										High
839	839	(Allen et al., 2016a)						Yes																										High
921	921	(Allen et al., 2014)																	Yes		Yes			Yes	Yes		Yes																		High		High
925	925	(Ballard et al., 2014)			Yes																										High
961	961	(Arthur et al., 2012)			Yes		Yes																		Yes						High		High
1104	1104	(Glen et al., 2006)						Yes																										High
1104	1104	(Glen et al., 2006)						Yes																										High
1104	1104	(Glen et al., 2006)						Yes																										High
1104	1104	(Glen et al., 2006)						Yes																										High
1104	1104	(Glen et al., 2006)						Yes																										High
1104	1104	(Glen et al., 2006)						Yes																										High
1104	1104	(Glen et al., 2006)						Yes																										High
1153	1153	(Edwards et al., 2002a)			Yes		Yes																								High		High
1178	1178	(Pople et al., 2000)		Yes																										High
1178	1178	(Pople et al., 2000)		Yes																										High
1178	1178	(Pople et al., 2000)		Yes																										High
1179	1179	(Twigg et al., 2000)			Yes																										High
1179	1179	(Twigg et al., 2000)			Yes																										High
1179	1179	(Twigg et al., 2000)			Yes																										High
1216	1216	(Fleming et al., 1996)			Yes																										High
1216	1216	(Fleming et al., 1996)			Yes																										High
1222	1222	(Catling and Burt, 1995a)					Yes																										High
1222	1222	(Catling and Burt, 1995a)					Yes																										High
1222	1222	(Catling and Burt, 1995a)					Yes																										High
1222	1222	(Catling and Burt, 1995a)					Yes																										High
1222	1222	(Catling and Burt, 1995a)					Yes																										High
1222	1222	(Catling and Burt, 1995a)					Yes																										High
1222	1222	(Catling and Burt, 1995a)					Yes																										High
1222	1222	(Catling and Burt, 1995a)					Yes																										High
1222	1222	(Catling and Burt, 1995a)					Yes																										High
1222	1222	(Catling and Burt, 1995a)					Yes																										High
1222	1222	(Catling and Burt, 1995a)					Yes																										High
1234	1234	(Jarman and Wright, 1993)				Yes	Yes																	Yes	Yes	Yes						High	Low
1241	1241	(Thomson, 1992d)						Yes																		Yes								High
1241	1241	(Thomson, 1992d)						Yes																		Yes								High
1241	1241	(Thomson, 1992d)						Yes																		Yes								High
1273	1273	(Thomson, 1986)				Yes										Yes										Yes						High										High
1273	1273	(Thomson, 1986)				Yes										Yes										Yes						High										High
1275	1275	(McLlroy et al., 1986)		Yes												Yes			Yes		Yes					Yes	Yes	Yes		Low												High			High		High
1283	1283	(Robertshaw and Harden, 1985a)						Yes																										High
1283	1283	(Robertshaw and Harden, 1985a)						Yes																										High
1283	1283	(Robertshaw and Harden, 1985a)						Yes																										High
1283	1283	(Robertshaw and Harden, 1985a)						Yes																										High
1283	1283	(Robertshaw and Harden, 1985a)						Yes																										High
1306	1306	(Dwyer et al., 1979)				Yes																										High
1306	1306	(Dwyer et al., 1979)				Yes																										High
1310	1310	(Whitehouse, 1977a)						Yes																										High
1318	1318	(Corbett and Newsome, 1975)							Yes		Yes							Yes					Yes			Yes	Yes	Yes							Low		High							High					Low
1318	1318	(Corbett and Newsome, 1975)							Yes		Yes							Yes					Yes			Yes	Yes	Yes							Low		High							High					Low
1320	1320	(Best et al., 1974)			Yes																										High
1320	1320	(Best et al., 1974)			Yes																										High
1320	1320	(Best et al., 1974)			Yes																										High
1325	1325	(Newsome et al., 1972)		Yes																										High
1325	1325	(Newsome et al., 1972)		Yes																										High
1325	1325	(Newsome et al., 1972)		Yes																										High
1325	1325	(Newsome et al., 1972)		Yes																										High
1325	1325	(Newsome et al., 1972)		Yes																										High
1325	1325	(Newsome et al., 1972)		Yes																										High
1325	1325	(Newsome et al., 1972)		Yes																										High
1325	1325	(Newsome et al., 1972)		Yes																										High
1325	1325	(Newsome et al., 1972)		Yes																										High
1325	1325	(Newsome et al., 1972)		Yes																										High
1325	1325	(Newsome et al., 1972)		Yes																										High
1325	1325	(Newsome et al., 1972)		Yes																										High
1325	1325	(Newsome et al., 1972)		Yes																										High
1325	1325	(Newsome et al., 1972)		Yes																										High
1325	1325	(Newsome et al., 1972)		Yes																										High
1325	1325	(Newsome et al., 1972)		Yes																										High
1325	1325	(Newsome et al., 1972)		Yes																										High
1325	1325	(Newsome et al., 1972)		Yes																										High
1325	1325	(Newsome et al., 1972)		Yes																										High
1329	1329	(Calaby, 1966)					Yes																										Low
1348	1348	(Tomlinson and Blair, 1952)																		Yes																										Low
1358	1358	(Sparkes et al., 2016)			Yes	Yes												Yes						Yes	Yes	Yes					High	High												High
1358	1358	(Sparkes et al., 2016)			Yes	Yes												Yes						Yes	Yes	Yes					High	High												High
1358	1358	(Sparkes et al., 2016)			Yes	Yes												Yes						Yes	Yes	Yes					High	High												High
1358	1358	(Sparkes et al., 2016)			Yes	Yes												Yes						Yes	Yes	Yes					High	High												High
1358	1358	(Sparkes et al., 2016)			Yes	Yes												Yes						Yes	Yes	Yes					High	High												High
1358	1358	(Sparkes et al., 2016)			Yes	Yes												Yes						Yes	Yes	Yes					High	High												High
1358	1358	(Sparkes et al., 2016)			Yes	Yes												Yes						Yes	Yes	Yes					High	High												High
1358	1358	(Sparkes et al., 2016)			Yes	Yes												Yes						Yes	Yes	Yes					High	High												High
1373	1373	(Schroeder et al., 2015)					Yes																										High
1374	1374	(Colman et al., 2015)			Yes		Yes																								High		High
1374	1374	(Colman et al., 2015)			Yes		Yes																								High		High
1374	1374	(Colman et al., 2015)			Yes		Yes																								High		High
1522	1522	(Jenkins et al., 2000)																			Yes																										High
1526	1526	(Balogh, 2000)	Dingoes of the New England and Guy Fawkes River National Parks of North East New South Wales - Are there any left out there?' Brad Nesbitt, Alan Wilton and David Jenkins p. 51-57					Yes													Yes						Yes	Yes	Yes					High													Low
1526	1526	(Balogh, 2000)	Dingoes of the New England and Guy Fawkes River National Parks of North East New South Wales - Are there any left out there?' Brad Nesbitt, Alan Wilton and David Jenkins p. 51-57					Yes													Yes						Yes	Yes	Yes					High													Low
1574	1574	(Fleming and Korn, 1989)				Yes																			Yes	Yes						High
1574	1574	(Fleming and Korn, 1989)				Yes																			Yes	Yes						High
1574	1574	(Fleming and Korn, 1989)				Yes																			Yes	Yes						High
1574	1574	(Fleming and Korn, 1989)				Yes																			Yes	Yes						High
1574	1574	(Fleming and Korn, 1989)				Yes																			Yes	Yes						High
1574	1574	(Fleming and Korn, 1989)				Yes																			Yes	Yes						High
1574	1574	(Fleming and Korn, 1989)				Yes																			Yes	Yes						High
1574	1574	(Fleming and Korn, 1989)				Yes																			Yes	Yes						High
1574	1574	(Fleming and Korn, 1989)				Yes																			Yes	Yes						High
1574	1574	(Fleming and Korn, 1989)				Yes																			Yes	Yes						High
1574	1574	(Fleming and Korn, 1989)				Yes																			Yes	Yes						High
1574	1574	(Fleming and Korn, 1989)				Yes																			Yes	Yes						High
1574	1574	(Fleming and Korn, 1989)				Yes																			Yes	Yes						High
1574	1574	(Fleming and Korn, 1989)				Yes																			Yes	Yes						High
1574	1574	(Fleming and Korn, 1989)				Yes																			Yes	Yes						High
1574	1574	(Fleming and Korn, 1989)				Yes																			Yes	Yes						High
1574	1574	(Fleming and Korn, 1989)				Yes																			Yes	Yes						High
1574	1574	(Fleming and Korn, 1989)				Yes																			Yes	Yes						High
1574	1574	(Fleming and Korn, 1989)				Yes																			Yes	Yes						High
1574	1574	(Fleming and Korn, 1989)				Yes																			Yes	Yes						High
1574	1574	(Fleming and Korn, 1989)				Yes																			Yes	Yes						High
1574	1574	(Fleming and Korn, 1989)				Yes																			Yes	Yes						High
1574	1574	(Fleming and Korn, 1989)				Yes																			Yes	Yes						High
1574	1574	(Fleming and Korn, 1989)				Yes																			Yes	Yes						High
1574	1574	(Fleming and Korn, 1989)				Yes																			Yes	Yes						High
1574	1574	(Fleming and Korn, 1989)				Yes																			Yes	Yes						High
1603	1603	(Whitehouse, 1978)					Yes												Yes					Yes	Yes	Yes	Yes	Yes					Low												High
1603	1603	(Whitehouse, 1978)																			Yes						Yes																				High
1616	1616	(Coman, 1972)						Yes																										High
1642	1642	(Tomlinson, 1954)				Yes	Yes																			Yes						High	Low
1642	1642	(Tomlinson, 1954)				Yes	Yes																			Yes						High	Low
1642	1642	(Tomlinson, 1954)				Yes	Yes																			Yes						High	Low
1642	1642	(Tomlinson, 1954)				Yes	Yes																			Yes						High	Low
1642	1642	(Tomlinson, 1954)				Yes	Yes																			Yes						High	Low
1642	1642	(Tomlinson, 1954)				Yes	Yes																			Yes						High	Low
1650	1650	(Durie and Riek, 1952)		Yes																										High
1682	1682.1	(Stephens, 2011b)	Chapter 4																								Yes		Yes
1682	1682.1	(Stephens, 2011b)	Chapter 4																								Yes		Yes
1682	1682.1	(Stephens, 2011b)	Chapter 4																								Yes		Yes
1682	1682.1	(Stephens, 2011b)	Chapter 4																								Yes		Yes
1682	1682.2	(Stephens, 2011a)	Chapter 2		Yes																										High
1682	1682.2	(Stephens, 2011a)	Chapter 2		Yes																										High
1682	1682.2	(Stephens, 2011a)	Chapter 2		Yes																										High
1682	1682.2	(Stephens, 2011a)	Chapter 2		Yes																										High
1682	1682.2	(Stephens, 2011a)	Chapter 2		Yes																										High
1682	1682.2	(Stephens, 2011a)	Chapter 2		Yes																										High
1683	1683.1	(Brook, 2013d)	Chapter 5															Yes																										High
1683	1683.2	(Brook, 2013a)	Appendix A					Yes																										High
1683	1683.2	(Brook, 2013a)	Appendix A					Yes																										High
1683	1683.2	(Brook, 2013a)	Appendix A					Yes																										High
1683	1683.2	(Brook, 2013a)	Appendix A					Yes																										High
1683	1683.2	(Brook, 2013a)	Appendix A					Yes																										High
1683	1683.2	(Brook, 2013a)	Appendix A					Yes																										High
1683	1683.2	(Brook, 2013a)	Appendix A					Yes																										High
1683	1683.3	(Brook, 2013b)	Chapter 3		Yes		Yes																		Yes						High		High
1683	1683.3	(Brook, 2013b)	Chapter 3		Yes		Yes																		Yes						High		High
1683	1683.3	(Brook, 2013b)	Chapter 3		Yes		Yes																		Yes						High		High
1683	1683.3	(Brook, 2013b)	Chapter 3		Yes		Yes																		Yes						High		High
1683	1683.4	(Brook, 2013c)	Chapter 4																Yes					Yes			Yes																		High
1683	1683.4	(Brook, 2013c)	Chapter 4																Yes					Yes			Yes																		High
1684	1684.1	(Wysong, 2016a)	Chapter 2		Yes		Yes																								High		High
1684	1684.2	(Wysong, 2016b)	Chapter 3					Yes																										High
1684	1684.3	(Wysong, 2016c)	Chapter 4				Yes												Yes								Yes						High												High
1686	1686.1	(Leo, 2016a)	Chapter 2		Yes																										High
1686	1686.1	(Leo, 2016a)	Chapter 2		Yes																										High
1686	1686.1	(Leo, 2016a)	Chapter 2		Yes																										High
1686	1686.1	(Leo, 2016a)	Chapter 2		Yes																										High
1686	1686.1	(Leo, 2016a)	Chapter 2		Yes																										High
1686	1686.1	(Leo, 2016a)	Chapter 2		Yes																										High
1686	1686.1	(Leo, 2016a)	Chapter 2		Yes																										High
1686	1686.2	(Leo, 2016b)	Chapter 3		Yes																										High
1686	1686.2	(Leo, 2016b)	Chapter 3		Yes																										High
1686	1686.2	(Leo, 2016b)	Chapter 3		Yes																										High
1686	1686.2	(Leo, 2016b)	Chapter 3		Yes																										High
1686	1686.2	(Leo, 2016b)	Chapter 3		Yes																										High
1686	1686.2	(Leo, 2016b)	Chapter 3		Yes																										High
1686	1686.2	(Leo, 2016b)	Chapter 3		Yes																										High
1686	1686.2	(Leo, 2016b)	Chapter 3		Yes																										High
1686	1686.3	(Leo, 2016c)	Chapter 4		Yes																			Yes	Yes						High
1686	1686.3	(Leo, 2016c)	Chapter 4		Yes																			Yes	Yes						High
1688	1688.1	(Morrant, 2015b)	Chapter 3					Yes																										High
1688	1688.2	(Morrant, 2015a)	Chapter 2				Yes												Yes		Yes			Yes			Yes	Yes					High												High		High
1688	1688.2	(Morrant, 2015a)	Chapter 2				Yes												Yes		Yes			Yes			Yes	Yes					High												High		High
1688	1688.2	(Morrant, 2015a)	Chapter 2				Yes												Yes		Yes			Yes			Yes	Yes					High												High		High
1688	1688.2	(Morrant, 2015a)	Chapter 2				Yes												Yes		Yes			Yes			Yes	Yes					High												High		High
1690	1690.1	(Gordon, 2015c)	Chapter 6		Yes			Yes																	Yes						High			Low
1690	1690.2	(Gordon, 2015a)	Chapter 2		Yes																										High
1690	1690.3	(Gordon, 2015b)	Chapter 3		Yes			Yes																							High			Low
1691	1691.1	(Purcell, 2008b)	Chapter 3		Yes			Yes																	Yes						High			High
1691	1691.1	(Purcell, 2008b)	Chapter 3		Yes			Yes																	Yes						High			High
1691	1691.2	(Purcell, 2008c)	Chapter 2																								Yes		Yes
1691	1691.2	(Purcell, 2008c)	Chapter 2																								Yes		Yes
1691	1691.3	(Purcell, 2008a)	Chapter 4				Yes							Yes				Yes	Yes	Yes	Yes	Yes		Yes	Yes			Yes					High							Low				High	High	High	High	High
1691	1691.3	(Purcell, 2008a)	Chapter 4				Yes							Yes				Yes	Yes	Yes	Yes	Yes		Yes	Yes			Yes					High							Low				High	High	High	High	High
1693	1693.1	(Brawata, 2012a)	Chapter 4		Yes																										High
1693	1693.1	(Brawata, 2012a)	Chapter 4		Yes																										High
1693	1693.1	(Brawata, 2012a)	Chapter 4		Yes																										High
1693	1693.1	(Brawata, 2012a)	Chapter 4		Yes																										High
1693	1693.1	(Brawata, 2012a)	Chapter 4		Yes																										High
1693	1693.2	(Brawata, 2012b)	Chapter 5				Yes																										High
1693	1693.2	(Brawata, 2012b)	Chapter 5				Yes																										High
1693	1693.2	(Brawata, 2012b)	Chapter 5				Yes																										High
1693	1693.2	(Brawata, 2012b)	Chapter 5				Yes																										High
1693	1693.2	(Brawata, 2012b)	Chapter 5				Yes																										High
1693	1693.3	(Brawata, 2012c)	Chapter 7																					Yes
1693	1693.3	(Brawata, 2012c)	Chapter 7																					Yes
1693	1693.3	(Brawata, 2012c)	Chapter 7																					Yes
1693	1693.3	(Brawata, 2012c)	Chapter 7																					Yes
1693	1693.3	(Brawata, 2012c)	Chapter 7																					Yes
1694	1694.1	(Newsome and Science, 2011b)	Chapter 5				Yes																										High
1694	1694.1	(Newsome and Science, 2011b)	Chapter 5				Yes																										High
1694	1694.2	(Newsome and Science, 2011a)	Chapter 3					Yes																										High
1694	1694.2	(Newsome and Science, 2011a)	Chapter 3					Yes																										High
1694	1694.2	(Newsome and Science, 2011a)	Chapter 3					Yes																										High
1694	1694.2	(Newsome and Science, 2011a)	Chapter 3					Yes																										High
1694	1694.2	(Newsome and Science, 2011a)	Chapter 3					Yes																										High
1694	1694.2	(Newsome and Science, 2011a)	Chapter 3					Yes																										High
1694	1694.2	(Newsome and Science, 2011a)	Chapter 3					Yes																										High
1694	1694.2	(Newsome and Science, 2011a)	Chapter 3					Yes																										High
1694	1694.2	(Newsome and Science, 2011a)	Chapter 3					Yes																										High
1694	1694.2	(Newsome and Science, 2011a)	Chapter 3					Yes																										High
1694	1694.2	(Newsome and Science, 2011a)	Chapter 3					Yes																										High
1694	1694.2	(Newsome and Science, 2011a)	Chapter 3					Yes																										High
1694	1694.2	(Newsome and Science, 2011a)	Chapter 3					Yes																										High
1694	1694.2	(Newsome and Science, 2011a)	Chapter 3					Yes																										High
1694	1694.2	(Newsome and Science, 2011a)	Chapter 3					Yes																										High
1694	1694.2	(Newsome and Science, 2011a)	Chapter 3					Yes																										High
1698	1698.1	(Allen, 2005a)	Chapter 3		Yes			Yes																	Yes			Yes			High			High
1698	1698.1	(Allen, 2005a)	Chapter 3		Yes			Yes																	Yes			Yes			High			High
1698	1698.2	(Allen, 2005b)	Chapter 5		Yes			Yes																	Yes						High			High
1699	1699	(McBride, 2007)					Yes												Yes								Yes	Yes					High												High
1699	1699	(McBride, 2007)					Yes												Yes								Yes	Yes					High												High
1703	1703.1	(Corbett, 1974b)	Chapter 2																										Yes
1703	1703.2	(Corbett, 1974c)	Chapter 3		Yes			Yes		Yes	Yes	Yes	Yes	Yes	Yes												Yes	Yes			Low			High		High	High	High	Low	High	High
1709	1709	(Paltridge, 2005)	Chapter 4		Yes		Yes																		Yes						High		Low
1709	1709	(Paltridge, 2005)	Chapter 4		Yes		Yes																		Yes						High		Low
1713	1713.1	(May, 2001b)	Chapter 5		Yes		Yes																								High		High
1713	1713.1	(May, 2001b)	Chapter 5		Yes		Yes																								High		High
1713	1713.1	(May, 2001b)	Chapter 5		Yes		Yes																								High		High
1713	1713.1	(May, 2001b)	Chapter 5		Yes		Yes																								High		High
1713	1713.2	(May, 2001a)	Chapter 4		Yes		Yes																		Yes						High		High
1713	1713.2	(May, 2001a)	Chapter 4		Yes		Yes																		Yes						High		High
1713	1713.3	(May, 2001c)	Chapter 6					Yes																										High
1713	1713.3	(May, 2001c)	Chapter 6					Yes																										High
1713	1713.4	(May, 2001d)	Chapter 7				Yes																										High
1713	1713.4	(May, 2001d)	Chapter 7				Yes																										High
1717	1717.1	(Fleming, 1996a)	Chapter 4	Yes	Yes																									High	High
1717	1717.1	(Fleming, 1996a)	Chapter 4	Yes	Yes																									High	High
1717	1717.2	(Fleming, 1996b)	Chapter 5		Yes																				Yes						High
1717	1717.2	(Fleming, 1996b)	Chapter 5		Yes																				Yes						High
1722	1722.1	(Doherty, 2015b)	Chapter 5		Yes		Yes																								High		High
1722	1722.2	(Doherty, 2015a)	Chapter 3		Yes		Yes	Yes																Yes							High		High	High
1731	1731	(Foulkes, 2001)			Yes		Yes	Yes																							High		High	High
1731	1731	(Foulkes, 2001)			Yes		Yes	Yes																							High		High	High
1749	1749.1	(Pascoe and Sciences, 2011b)	Chapter 5		Yes																			Yes	Yes						High
1749	1749.1	(Pascoe and Sciences, 2011b)	Chapter 5		Yes																			Yes	Yes						High
1749	1749.1	(Pascoe and Sciences, 2011b)	Chapter 5		Yes																			Yes	Yes						High
1749	1749.2	(Pascoe and Sciences, 2011a)	Chapter 3		Yes		Yes																								High		High
1749	1749.2	(Pascoe and Sciences, 2011a)	Chapter 3		Yes		Yes																								High		High
1749	1749.2	(Pascoe and Sciences, 2011a)	Chapter 3		Yes		Yes																								High		High
1766	1766	(Andrew, 2005)	Chapter 6					Yes																										High
2618	2618	(Department of Natural Resources, 2014)																									Yes	Yes	Yes
2619	2619	(Stephen R. Eldridge et al., 2002)			Yes	Yes		Yes																					Yes		High	High		High
2619	2619	(Stephen R. Eldridge et al., 2002)			Yes	Yes		Yes											Yes		Yes								Yes		High	High		High											High		High
2619	2619	(Stephen R. Eldridge et al., 2002)			Yes	Yes		Yes											Yes		Yes								Yes		High	High		High											High		High
2623	2623	(Bird, 1994)				Yes																										High
2623	2623	(Bird, 1994)			Yes	Yes			Yes							Yes		Yes				Yes									High	High			High							Low		Low				Low
2624	2624	(Meek and Brown, 2016)																Yes						Yes		Yes																		Low
2664	2664	(Robertshaw and Harden, 1986)			Yes	Yes		Yes																	Yes						High	Low		High
2664	2664	(Robertshaw and Harden, 1986)			Yes	Yes		Yes																	Yes						High	Low		High
2664	2664	(Robertshaw and Harden, 1986)			Yes	Yes		Yes																	Yes						High	Low		High
2683	2683	(Read and Eldridge, 2010)			Yes																										High
2683	2683	(Read and Eldridge, 2010)			Yes																										High
2683	2683	(Read and Eldridge, 2010)			Yes																										High
2683	2683	(Read and Eldridge, 2010)			Yes																										High
2683	2683	(Read and Eldridge, 2010)			Yes																										High
2683	2683	(Read and Eldridge, 2010)			Yes																										High
2683	2683	(Read and Eldridge, 2010)			Yes																										High
2683	2683	(Read and Eldridge, 2010)			Yes																										High
2683	2683	(Read and Eldridge, 2010)			Yes																										High
2683	2683	(Read and Eldridge, 2010)			Yes																										High
2683	2683	(Read and Eldridge, 2010)			Yes																										High
2683	2683	(Read and Eldridge, 2010)			Yes																										High
2685	2685	(Edwards et al., 2000)			Yes																										High
2708	2708	(Hunt et al., 2007)			Yes																										High
2708	2708	(Hunt et al., 2007)			Yes																										High
2822	2822	(Eldridge S.R. et al., 2016)			Yes			Yes	Yes																Yes		Yes				High			High	High
2822	2822	(Eldridge S.R. et al., 2016)			Yes			Yes																	Yes						High			High
2822	2822	(Eldridge S.R. et al., 2016)			Yes			Yes																	Yes						High			High
2822	2822	(Eldridge S.R. et al., 2016)			Yes			Yes																	Yes						High			High
2822	2822	(Eldridge S.R. et al., 2016)			Yes			Yes																	Yes						High			High
2853	2853.1	(Angel, 2006a)	Chapter 3		Yes																				Yes						High
2853	2853.1	(Angel, 2006a)	Chapter 3		Yes																				Yes						High
2853	2853.2	(Angel, 2006c)	Chapter 5				Yes																										High
2853	2853.2	(Angel, 2006c)	Chapter 5				Yes																										High
2853	2853.3	(Angel, 2006b)	Chapter 4					Yes																										High
2853	2853.3	(Angel, 2006b)	Chapter 4					Yes																										High
2853	2853.3	(Angel, 2006b)	Chapter 4					Yes																										High
2853	2853.3	(Angel, 2006b)	Chapter 4					Yes																										High
2853	2853.3	(Angel, 2006b)	Chapter 4					Yes																										High
2853	2853.3	(Angel, 2006b)	Chapter 4					Yes																										High
2853	2853.3	(Angel, 2006b)	Chapter 4					Yes																										High
2853	2853.3	(Angel, 2006b)	Chapter 4					Yes																										High
2856	2856.1	(Corbett, 2009a)	Preliminary Assessment of Selected Data Associated with Dingo Research & Management Supplement 1 to Audit (2009) of Fraser Island Dingo Management Strategy													Yes																										High
2856	2856.2	(Corbett, 2009b)	Main report			Yes																					Yes	Yes				High
2857	2857	(Queensland and Wildlife, 2010)		Yes																		Yes		Yes			Yes	Yes		Low																		High
2868	2868	(Queensland. Environmental Protection, 2001)				Yes																										Low
2868	2868	(Queensland. Environmental Protection, 2001)				Yes																										Low
2868	2868	(Queensland. Environmental Protection, 2001)				Yes																										Low
2868	2868	(Queensland. Environmental Protection, 2001)				Yes																										Low
2875	2875	(Appleby and Jones)		Yes																							Yes	Yes		High
2879	2879	(Baxter and Davies, 2013)					Yes									Yes			Yes		Yes			Yes	Yes	Yes	Yes	Yes					High									Low			High		High
2883	2883	(Corbett, 1998)		Yes						Yes	Yes				Yes											Yes	Yes	Yes		High						High	High				Low
2887	2887	(Gonzalez et al., 2000)			Yes			Yes															Yes		Yes		Yes	Yes	Yes		High			High															Low
2887	2887	(Gonzalez et al., 2000)			Yes			Yes															Yes		Yes		Yes	Yes	Yes		High			High															Low
2887	2887	(Gonzalez et al., 2000)			Yes			Yes															Yes		Yes		Yes	Yes	Yes		High			High															Low
2887	2887	(Gonzalez et al., 2000)			Yes			Yes															Yes		Yes		Yes	Yes	Yes		High			High															Low
2890	2890	(Lawrance and Higginbottom, 2002)				Yes								Yes				Yes			Yes	Yes	Yes			Yes	Yes	Yes				High								Low				Low			High	Low	Low
2890	2890	(Lawrance and Higginbottom, 2002)				Yes								Yes				Yes			Yes	Yes	Yes			Yes	Yes	Yes				High								Low				Low			High	Low	Low
2890	2890	(Lawrance and Higginbottom, 2002)				Yes								Yes				Yes			Yes	Yes	Yes			Yes	Yes	Yes				High								Low				Low			High	Low	Low
2890	2890	(Lawrance and Higginbottom, 2002)				Yes								Yes				Yes			Yes	Yes	Yes			Yes	Yes	Yes				High								Low				Low			High	Low	Low
2890	2890	(Lawrance and Higginbottom, 2002)				Yes								Yes				Yes			Yes	Yes	Yes			Yes	Yes	Yes				High								Low				Low			High	Low	Low
2890	2890	(Lawrance and Higginbottom, 2002)				Yes								Yes				Yes			Yes	Yes	Yes			Yes	Yes	Yes				High								Low				Low			High	Low	Low
2890	2890	(Lawrance and Higginbottom, 2002)				Yes								Yes				Yes			Yes	Yes	Yes			Yes	Yes	Yes				High								Low				Low			High	Low	Low
2890	2890	(Lawrance and Higginbottom, 2002)				Yes								Yes				Yes			Yes	Yes	Yes			Yes	Yes	Yes				High								Low				Low			High	Low	Low
2902	2902	(Australian Vertebrate Pest Control and Queensland. Rural Lands Protection, 1987)	Aerial Baiting to control dingoes in Western Australia' P.R. Marsack and P.C. Thomson p.125-128													Yes																										High
2902	2902	(Australian Vertebrate Pest Control and Queensland. Rural Lands Protection, 1987)	Aerial Baiting to control dingoes in Western Australia' P.R. Marsack and P.C. Thomson p.125-128													Yes																										High
2903	2903	(Mitchell et al., 1982)		Yes			Yes																			Yes			Yes	High			High
2909	2909	(Tierney and Strong, 1987)			Yes																										High
2924	2924	(Augusteyn et al., 2010)			Yes			Yes																	Yes						High			High
2927	2927	(McNeill et al., 2016)					Yes												Yes		Yes			Yes			Yes	Yes					High												High		High
2927	2927	(McNeill et al., 2016)					Yes												Yes		Yes			Yes			Yes	Yes					High												High		High
2927	2927	(McNeill et al., 2016)					Yes												Yes		Yes			Yes			Yes	Yes					High												High		High
2927	2927	(McNeill et al., 2016)					Yes												Yes		Yes			Yes			Yes	Yes					High												High		High
2930	2930	(Allen et al., 2016b)																	Yes		Yes			Yes			Yes	Yes																	High		High
2932	2932	(Allen and Byrne, 2008)					Yes							Yes					Yes	Yes		Yes	Yes		Yes								Low							High					Low	High		High	Low
2932	2932	(Allen and Byrne, 2008)					Yes							Yes					Yes	Yes		Yes	Yes		Yes								Low							High					Low	High		High	Low
2932	2932	(Allen and Byrne, 2008)					Yes							Yes					Yes	Yes		Yes	Yes		Yes								Low							High					Low	High		High	Low
3166	3166	(Reynolds et al., 2016)						Yes																										Low
3431	3431	(Hernandez-Santin et al., 2016)					Yes																	Yes									High
3431	3431	(Hernandez-Santin et al., 2016)					Yes																	Yes									High
3570	3570	(Goldingay and Whelan, 1997)			Yes		Yes																								Low		Low
3570	3570	(Goldingay and Whelan, 1997)			Yes		Yes																								Low		Low
3570	3570	(Goldingay and Whelan, 1997)			Yes		Yes																								Low		Low
3679	3679	(Corbett, 1988)								Yes	Yes	Yes	Yes	Yes	Yes	Yes		Yes								Yes	Yes	Yes								High	High	High	High	Low	High	High		High
3683	3683	(Coman and Robinson, 1989)					Yes				Yes										Yes												High				Low										High
5433	5433	(Catling et al., 2000)					Yes																		Yes								High
5433	5433	(Catling et al., 2000)					Yes																		Yes								High
5433	5433	(Catling et al., 2000)					Yes																		Yes								High
5433	5433	(Catling et al., 2000)					Yes																		Yes								High
5433	5433	(Catling et al., 2000)					Yes																		Yes								High
5433	5433	(Catling et al., 2000)					Yes																		Yes								High
5433	5433	(Catling et al., 2000)					Yes																		Yes								High
5433	5433	(Catling et al., 2000)					Yes																		Yes								High
5433	5433	(Catling et al., 2000)					Yes																		Yes								High
5433	5433	(Catling et al., 2000)					Yes																		Yes								High
5433	5433	(Catling et al., 2000)					Yes																		Yes								High
5433	5433	(Catling et al., 2000)					Yes																		Yes								High
5433	5433	(Catling et al., 2000)					Yes																		Yes								High
5437	5437	(Wilton, 2001)																											Yes
5448	5448.1	(Best, 1978)	Dingo movements in central Australia' L.W. Best p.38-40																Yes			Yes				Yes																			High			High
5448	5448.1	(Best, 1978)	Dingo movements in central Australia' L.W. Best p.38-40																Yes			Yes				Yes																			High			High
5448	5448.2	(Catling, 1978)	Dingo movements in south-eastern New South Wales' P.C. Catling p.40-42	Yes			Yes												Yes			Yes		Yes						High			Low												High			High
5448	5448.2	(Catling, 1978)	Dingo movements in south-eastern New South Wales' P.C. Catling p.40-42	Yes			Yes												Yes			Yes		Yes						High			Low												High			High
5464	5464	(Newsome and Catling, 1979)			Yes		Yes																								High		High
5464	5464	(Newsome and Catling, 1979)			Yes		Yes																								High		High
5483	5483	(Corbett L, 1983)						Yes																										High
5483	5483	(Corbett L, 1983)						Yes																										High
5483	5483	(Corbett L, 1983)						Yes																										High
5483	5483	(Corbett L, 1983)						Yes																										High
5483	5483	(Corbett L, 1983)						Yes																										High
5485	5485	(Eldridge DT and Bryan R, 1995)			Yes		Yes																								Low		Low
[truncated: 19 more columns]
